# Supplementary material for: The Mechanism of Tigecycline Resistance in Acinetobacter baumannii under Sub-Minimal Inhibitory Concentrations of Tigecycline
Source: MDPI journal article supplement (doi:10.3390/ijms25031819), 2024-02-02
Supplement: s1 [file s1]

**Proteomics-based study on the mechanism of tigecycline resistance in**  
***Acinetobacter baumannii***

Cunwei Liu<sup>†</sup>, Jia Liu<sup>†</sup>, Qinghui Lu, Ping Wang, Qinghua Zou\*

Department of Microbiology and Infectious Disease Center, School of Basic  
Medical Sciences, Peking University Health Science Center, Beijing, 100191,  
China

**\* Corresponding author contact information**

Qinghua Zou, Ph.D.

Department of Microbiology and Infectious Disease Center, School of Basic Medical  
Sciences, Peking University Health Science Center

Address: 38 Xueyuan Road, Haidian District, Beijing 100191, China

Phone: 86-10-82805070

E-mail: [zouqinghua@bjmu.edu.cn](mailto:zouqinghua@bjmu.edu.cn)

<sup>†</sup> Cunwei Liu and Jia Liu contributed equally to this work.

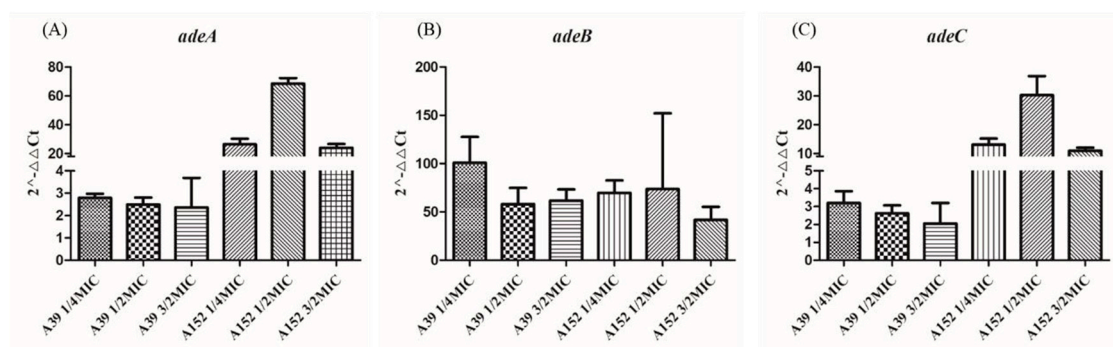

Figure S1. qRT-PCR results of *adeA* (A), *adeB* (B) and *adeC* (C) in A139 and A152 strains.

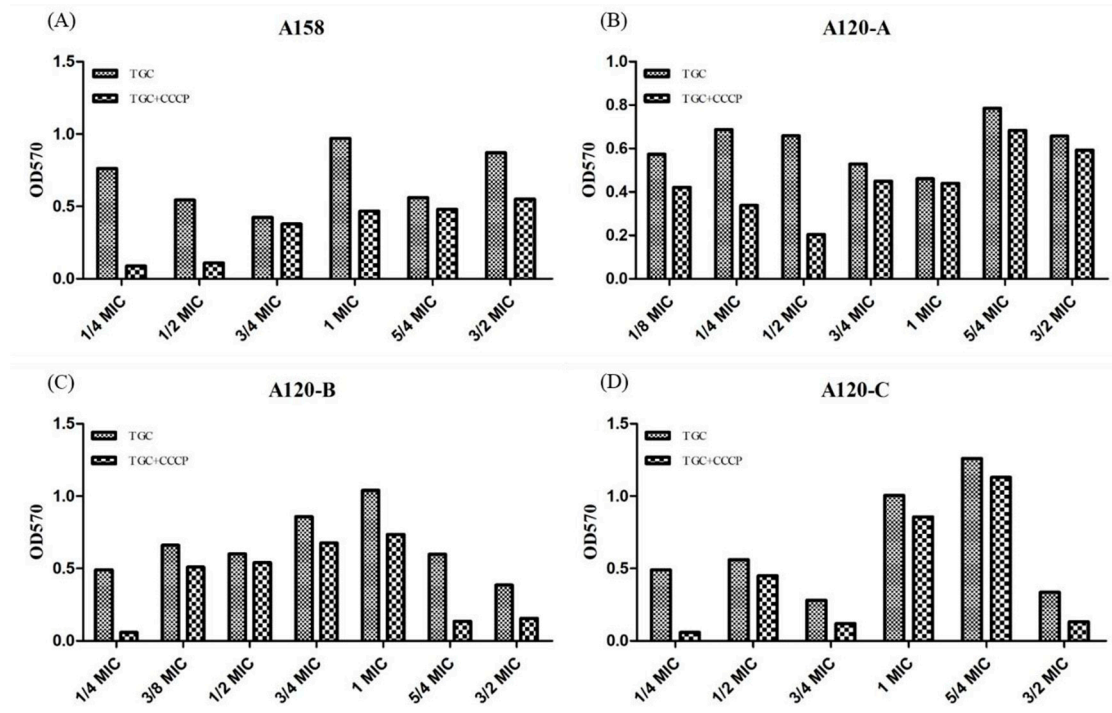

Figure S2. OD<sub>570</sub> of bacteria in tigecycline induction process with only tigecycline and tigecycline + CCCP. TGC, tigecycline; CCCP, carbonyl cyanide m-chlorophenyl hydrazine.
